# Supplementary material for: Fibroblast growth factor 8b induces uncoupling protein 1 expression in epididymal white preadipocytes
Source: PubMed Central journal article supplement (PMC6560125; doi:10.1038/s41598-019-44878-w), 2019-06-11
Supplement: 41598_2019_44878_MOESM1_ESM.pdf [file 41598_2019_44878_MOESM1_ESM.pdf]

## **Supplemental Information**

### **Fibroblast growth factor 8b induces uncoupling protein 1 expression in epididymal white preadipocytes**

Sören Westphal<sup>1\*</sup>, Thomas Gantert<sup>2</sup>, Caroline Kless<sup>2</sup>, Kristina Hüttinger<sup>2</sup>, Martin Klingenspor<sup>2,3,4</sup> and Tobias Fromme<sup>2\*</sup>

<sup>1</sup>: Department of Internal Medicine II, University of Ulm, Ulm, Germany

<sup>2</sup>: Chair of Molecular Nutritional Medicine, TUM School of Life Sciences, Technical University of Munich, Freising, Germany

<sup>3</sup>: EKfZ - Else Kröner-Fresenius Center for Nutritional Medicine, Technical University of Munich, Freising, Germany

<sup>4</sup>: ZIEL - Institute for Food & Health, Technical University of Munich, Freising, Germany

\*corresponding authors:

Dr. Tobias Fromme  
Technical University of Munich  
Chair of Molecular Nutritional Medicine  
Gregor-Mendel-Str. 2  
85354 Freising, Germany  
Tel. +49.8161.71.3850  
[fromme@tum.de](mailto:fromme@tum.de)

Dr. Sören Westphal  
Department of Internal Medicine II  
University of Ulm  
Albert Einstein Allee 33  
89081 Ulm, Germany  
Tel. +49.171.3213685  
[soeren.westphal@t-online.de](mailto:soeren.westphal@t-online.de)

## Supplemental Figure 1

### **A (Control)**

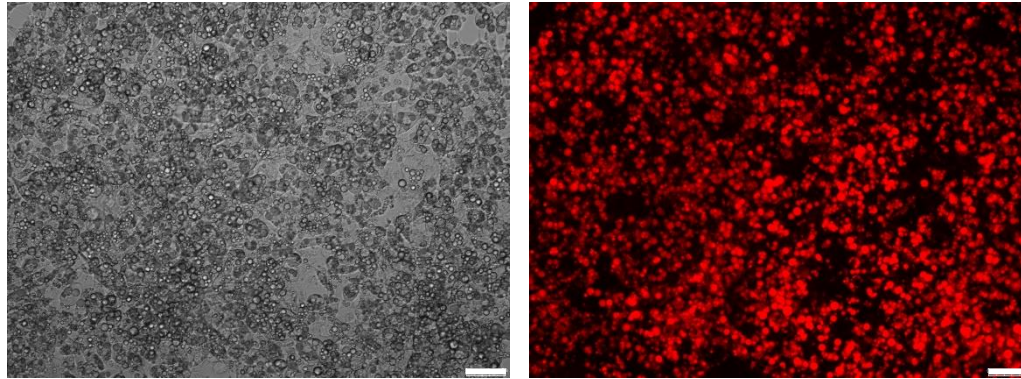

### **B (FGF8b)**

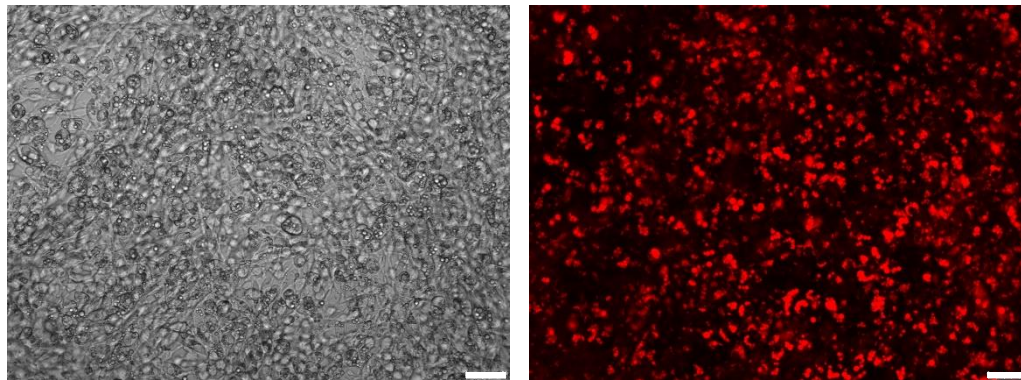

**Supplemental Figure 1 – Cellular morphology is altered by Fgf8b treatment.** Representative image of differentiated adipocytes treated with 125ng/ml Fgf8b during six days of differentiation (A) or not (B). Left panels are bright field images, right panel show a fluorescent BOPIDY stain to visualize intracellular lipid. All scale bars = 50µm.

## Supplemental Figure 2

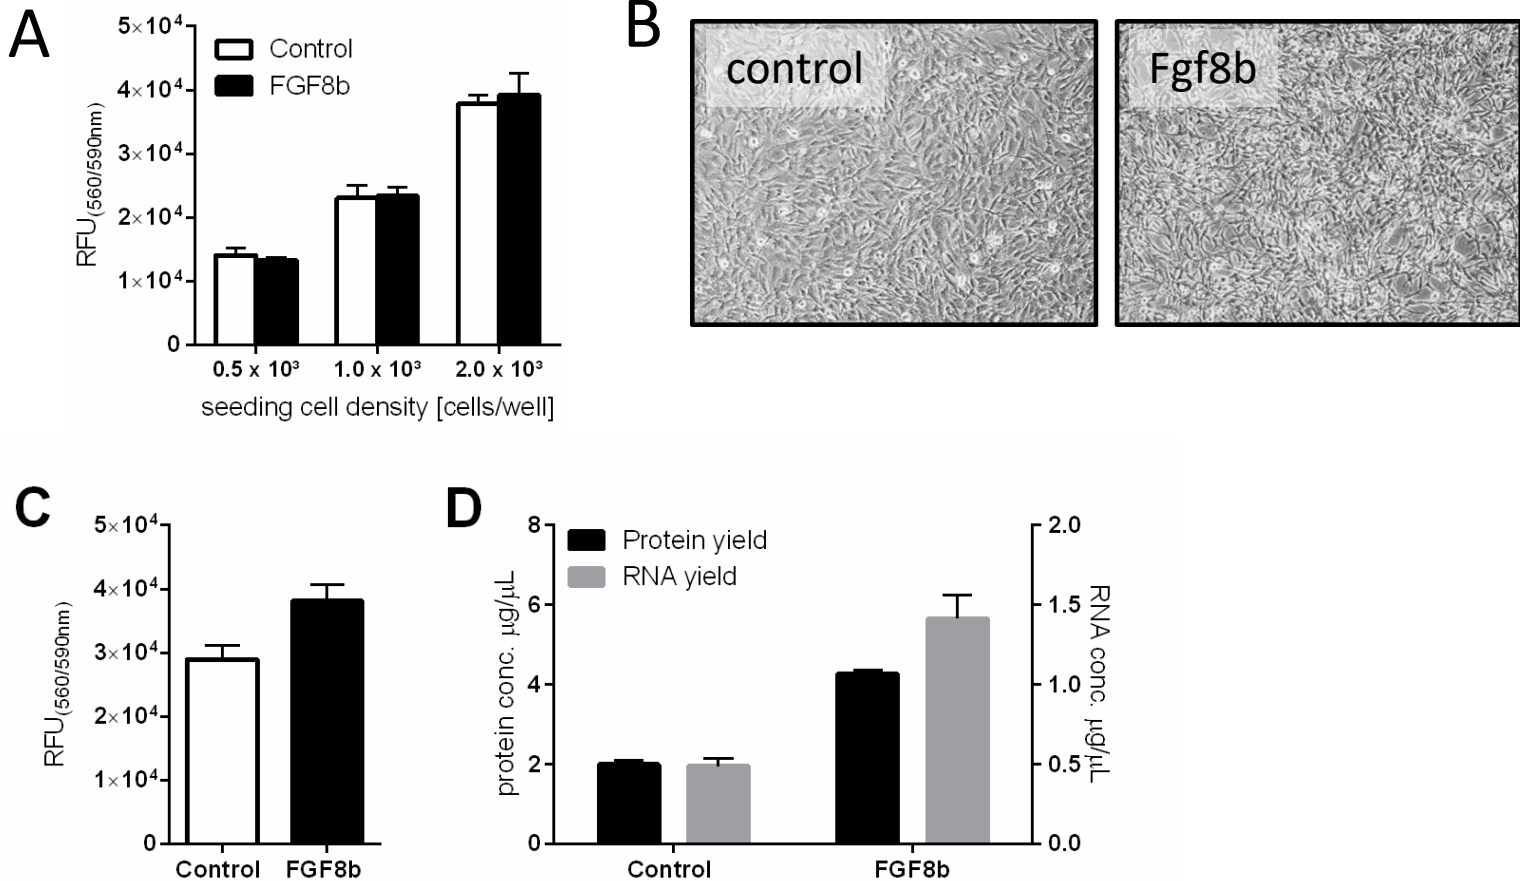

**Supplemental Figure 2 - Fgf8b did not increase proliferation rate, but abrogated contact inhibition.** A - Resazurin reduction after 4h of exposure as a proxy of cell number 48h after seeding preadipocytes in different initial densities. Proliferation rate is not altered in the subconfluent state. B – Representative images of proliferating preadipocytes 2 days after first reaching confluency in the absence or presence of 125ng/ml FGF8b. C - Resazurin reduction after 4h of exposure as a proxy of cell number 48h after first reaching confluency. Cells grow much denser in the presence of Fgf8b. D – Both protein and RNA amount isolated from preadipocytes 48h after first reaching confluency is increased by Fgf8b exposure.

## Supplemental Figure 3

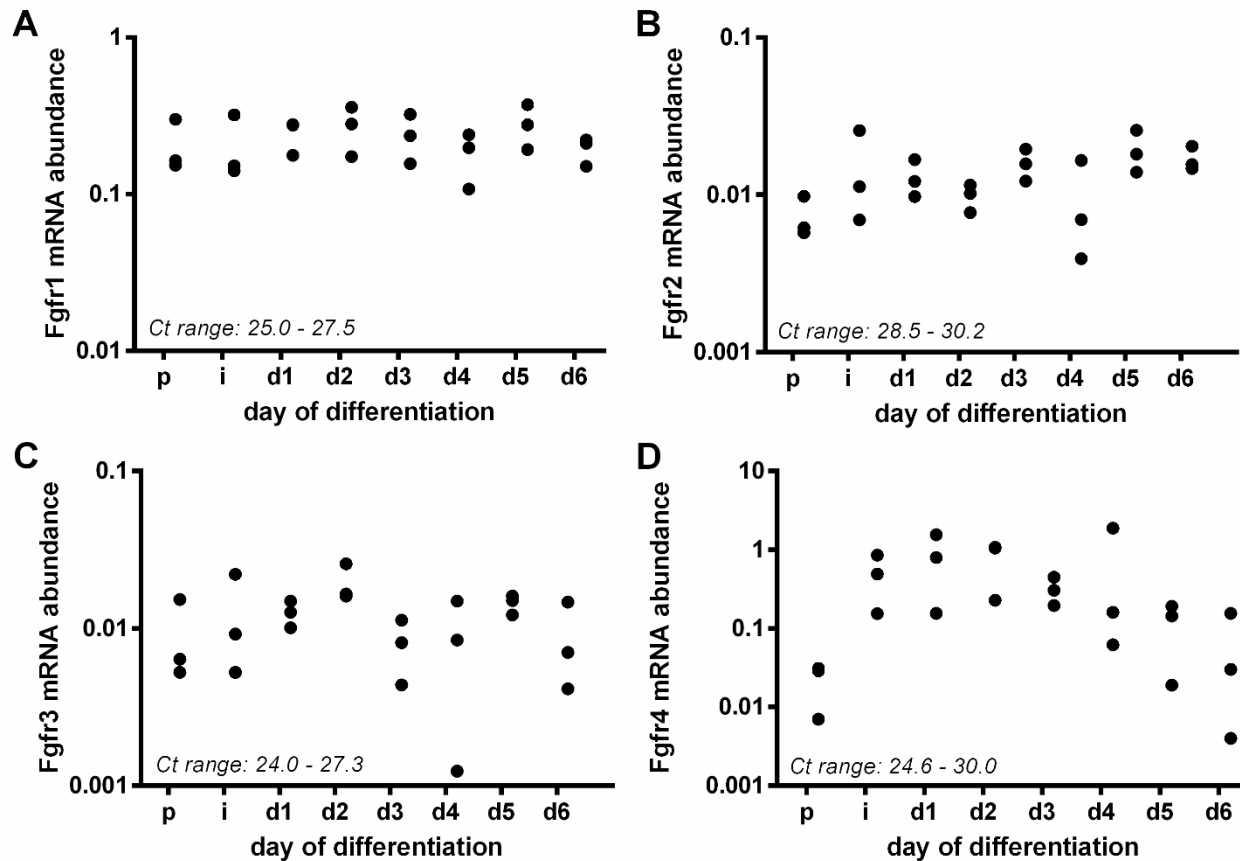

**Supplemental Figure 3 Transcript abundance of fibroblast growth factor receptors during adipocyte differentiation.** We determined transcript abundance of fibroblast growth factors (Fgfr) 1 to 4 in cultured white adipocytes including proliferating (p) cells, cells during induction (i) and differentiation (d followed by number of differentiation day). All transcripts were normalized to heat shock protein 90 (Hsp90) abundance, n=3-6. We provided cycle time (Ct) ranges as a surrogate for absolute expression differences between receptors.

## Supplemental Figure 4

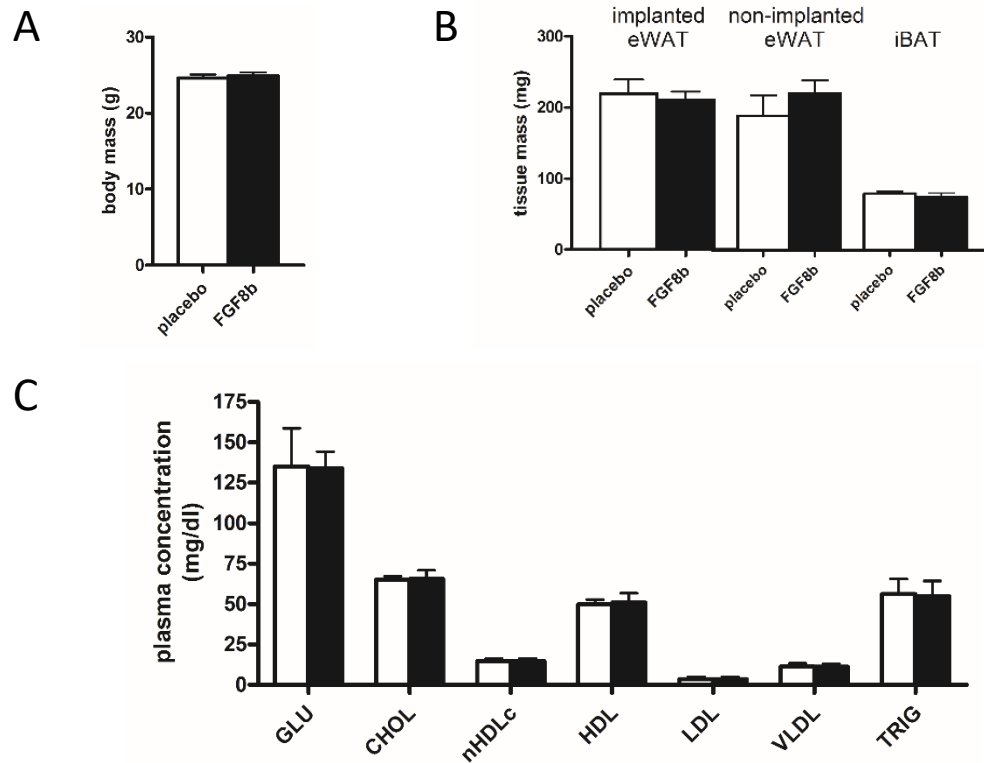

**Supplemental Figure 4 - Physiological data of mice implanted with Fgf8b release or placebo pellets.** A - Body mass 3 weeks post-implantation. B - Masses of implanted epididymal, non-implanted contralateral epididymal and interscapular brown fat depot. C - Plasma metabolites of carbohydrate and lipid metabolism were not affected by Fgf8b treatment. GLU - glucose, CHOL - total cholesterol, nHDLc - non-HDL cholesterol, HDL - high density lipoproteins, LDL - low density lipoproteins, VLDL - very low density lipoproteins, TRIG - triglycerides.

## Supplemental Figure 5

Western Blot shown cropped in Figure 1D

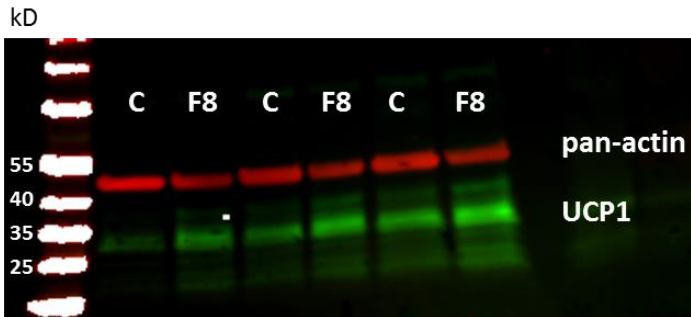

C = control, F8 = Fgf8b treated. Shown is the entire area scanned (Odyssey Imaging System, Licor).

Western Blot shown cropped in Figure 3C

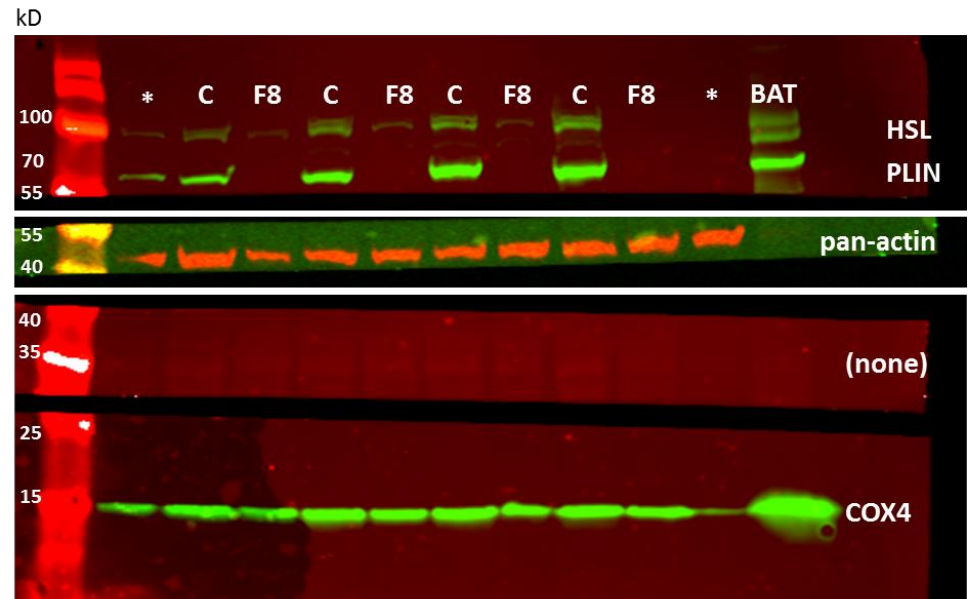

The blot was physically cut into four sections and each incubated with different combinations of primary and secondary antibody. C = control, F8 = Fgf8b treated, BAT = brown adipose tissue protein lysate, \* = unrelated samples. Shown is the entire area scanned (Odyssey Imaging System, Licor).

# Supplemental Table 1

| target   | primer 1                  | primer 2                    | reference                                                                |
|----------|---------------------------|-----------------------------|--------------------------------------------------------------------------|
| Actb     | AGAGGGAAATCGTGCCTGAC      | CAATAGTGATGACCTGGCCGT       |                                                                          |
| Cd137    | CGTGCAGAACTCCTGTGATAAC    | GTCCACCTATGCTGGAGAAGG       | Wu, J. et al.; Cell 150, 366-376 (2012)                                  |
| Cidea    | TGCTCTTCTGTATCGCCAGT      | GCCGTGTTAAGGAATCTGCTG       |                                                                          |
| Cox7a1   | CCGACAATGACCTCCCAGTA      | TGTTTGTCCAAGTCTCCAA         |                                                                          |
| Cs       | CTGAGGAAGACTGACCTCG       | TTCATCTCCGTCATGCCATA        |                                                                          |
| Elovl3   | TCCGCGTTCTCATGTAGTCT      | GGACCTGATGCAACCCTATGA       |                                                                          |
| Fabp4    | GATGGTGACAAGCTGGTGGT      | TTTATTTAATCAACATAACCATATCCA |                                                                          |
| Fasn     | GCATTCAGAATCGTGGCATA      | TTGCTGGCACTACAGAATGC        |                                                                          |
| Fgf21    | GTGTCAAAGCCTCTAGGTTTCTT   | GGTACACATTGTAACCGTCTC       |                                                                          |
| Fgfr1    | CCACCAACTGCTTGAACGTA      | CCGGATCTACACACACCAGA        |                                                                          |
| Fgfr2    | AAACACAGAATCGTCCCCTG      | AGGGACACAGGATGGACAAG        |                                                                          |
| Fgfr3    | TGAGGATGCGGTCTAAATCC      | ACCGAGTCTACACCCACCAG        |                                                                          |
| Fgfr4    | AAGGAGAGTGGTCTTCGCT       | GTGGCTGTGAAGATGCTGAA        |                                                                          |
| Gtf2b    | GCTGTGGAAGTGGACTTGGT      | AGTTTGTCCACTGGGGTGTCT       |                                                                          |
| Hoxc9    | GCAGCAAGCACAAAGAGGAGAAG   | GCGTCTGGTACTTGGTGTAGGG      | Walden, T. B. et al., Am J Physiol Endocrinol Metab 302, E19-31, (2012). |
| Hsl      | GCTTGGTTCAACTGGAGAGC      | GCCTAGTGCCTTCTGGTCTG        |                                                                          |
| Hsp90    | AGGAGGGTCAAGGAAGTGGT      | TTTTTCTTGTCTTTGCCGCT        |                                                                          |
| Klb      | ATGTCCAGGAGGCTCTGAAA      | AGCAAATGGTGCAGTCTGTG        | Wu, J. et al.; Cell 150, 366-376 (2012)                                  |
| Otop1    | GGACCTGATGCAACCCTATGA     | ACCATGCTCTACGTGCTGTG.       |                                                                          |
| Pparg    | TCAGCTCTGTGGACCTCTCC      | ACCCTTGCATCCTTCAAAAG        |                                                                          |
| Ppargc1a | GGACGGAAGCAATTTTTCAA      | GAGTCTTGGGAAAGGACACG        |                                                                          |
| Prdm16   | CTGTTAGCTTTGGAGCCGAC      | GACGAGGGTCTGTGATGTT         |                                                                          |
| Pref1    | GGAGGCTGGTATGAGGAGATC     | AGAGCTCTAAGGAACCCCGGTA      |                                                                          |
| Shox2    | TGGAACAACCTCAACGAGCTGGAGA | TTCAAACCTGGCTAGCGGCTCCTAT   | Walden, T. B. et al., Am J Physiol Endocrinol Metab 302, E19-31, (2012). |
| Slc27a1  | CTGGGACTTCCGTGGACCT       | TCTTGACAGACGATACGCAGAA      | Wu, J. et al.; Cell 150, 366-376 (2012)                                  |
| Tbx1     | GGCAGGCAGACGAATGTTT       | TTGTCATCTACGGGCACAAAG       | Wu, J. et al.; Cell 150, 366-376 (2012)                                  |
| Tmem26   | ACCCTGTCATCCACAGAG        | TGTTTGGTGGAGTCTTAAGGTC      | Wu, J. et al.; Cell 150, 366-376 (2012)                                  |
| Ucp1     | TCTCTGCCAGGACAGTACCC      | AGAAGCCCAATGATGTTTCAAG      |                                                                          |
